# Supplementary material
Source: PubMed Central journal article supplement (PMC3162437)
Supplement: supp_M111.256263_jbc.M111.256263-1.pdf [file supp_M111.256263_jbc.M111.256263-1.pdf]

Supplementary 1

Sequencing results of Csn2 bound endogenous DNAs.

1. 1843983-1844127 *Escherichia coli* BL21(DE3) 145 bp  
CCTCACGCGGTGGTCTGGCAATCAAAGTCCAGTGTGACTAATACTTCTTACTCGCCCAT  
CTGCAACGGATGGGCGAATTTATACCCGCTTTCTCGTCTGCTGTAATATTCCCCTACTAC  
ACTTCCACTGTTGCGTCAGGCGTTTGT

2. 1554467-1554696 *Escherichia coli* BL21(DE3) 230 bp  
CCAATAAGCCGGTGGTACTGAGGGCGTCAGGTGCGAACTCTATTCTGGCGGAATTAAG  
TAATGAAGCCGTGGCGTTATCGATGGATGATGCCGTGCGCCTGAACAGTTGCGCGGTG  
GCGGCGCAGGTTTATATCGGCAGCGAATATGAACATCAGTCGATCAAAAATATTATTCA  
GCTGGTTGATGCCGGAATGAAAGTGGGAATGCCGGCCATGGCCGTGACTGGCGTG

3. 3532715-3532920 *Escherichia coli* BL21(DE3) 206 bp  
ATCCCCATCGCCGCACTATTTACCGCCAACGCAAATGTCTCGACGGTTGAATCACGAG  
GCACAATGGCCAGCACATTAATAATGGATAACTTCCTGTAACCACCGTTTATTGCAATCC  
GTCGCCGTGATTAACACCTTAACCTCAGGAACTGCACCACGGTTTTTTGCAGCAACCA  
GTAG CAAAACCTCACCATCCTGATCGCCATC

4. Expression vector pET28aLIC 106 bp  
ACTCGAGCACCACCACCACCACCACTGAGATCCGGCTGCTAACAAAGCCCCGAAAGGAA  
GC TGAGTTGGCTGCTGCCACCGCTGAGCAATAACTAGCATAACCCCTT
